# Supplementary material for: Boosting the oxygen reduction reaction behaviour of atomic Fe–N4active sites in porous honeycomb-like carbonviaP heteroatom doping
Source: Royal Society of Chemistry journal article supplement (doi:10.1039/d2ta04255j), 2022-01-01
Supplement: d2ta04255j1.pdf [file d2ta04255j1.pdf]

## Supporting Information

### **Boosting the Oxygen Reduction Reaction Behaviour of Atomic Fe-N<sub>4</sub> Active Sites in the Porous Honeycomb-like Carbon *via* P Heteroatom Doping**

Jin Li <sup>a</sup>, Kaicai Fan <sup>b</sup>, Hongliang Jiang <sup>c</sup>, Fenghong Lu <sup>a</sup>, Lixiu Cui <sup>a</sup>, Bin Li <sup>b</sup>, Qi  
Zhang <sup>a</sup>, Gao-Chao Fan <sup>a,\*</sup>, Lingbo Zong <sup>a,\*</sup>, Lei Wang <sup>a,d,\*</sup>

a: Key Laboratory of Eco-chemical Engineering, College of Chemistry and Molecular  
Engineering, Qingdao University of Science and Technology, Qingdao 266042, China

b: College of Materials Science and Engineering, Qingdao University of Science and  
Technology, Qingdao 266042, China

c: Key Laboratory for Ultrafine Materials of Ministry of Education, School of  
Chemical Engineering, East China University of Science and Technology, Shanghai  
200237, China

d: Shandong Engineering Research Centre of Marine Environment Corrosion and  
Safety Protection, College of Environment and Safety Engineering, Qingdao  
University of Science and Technology, Qingdao 266042, China

\* Corresponding authors:

*E-mail addresses:* gcfan@qust.edu.cn; lingbozong@qust.edu.cn;

inorchemwl@126.com

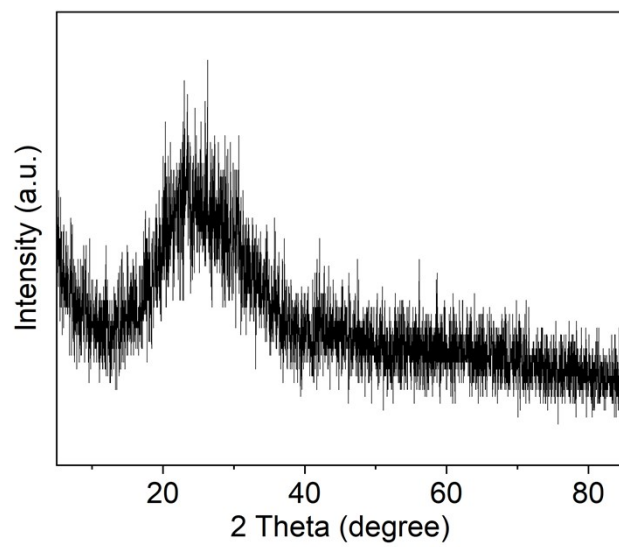

**Fig. S1.** The XRD pattern of Fe-N<sub>4</sub>/NP-PHC.

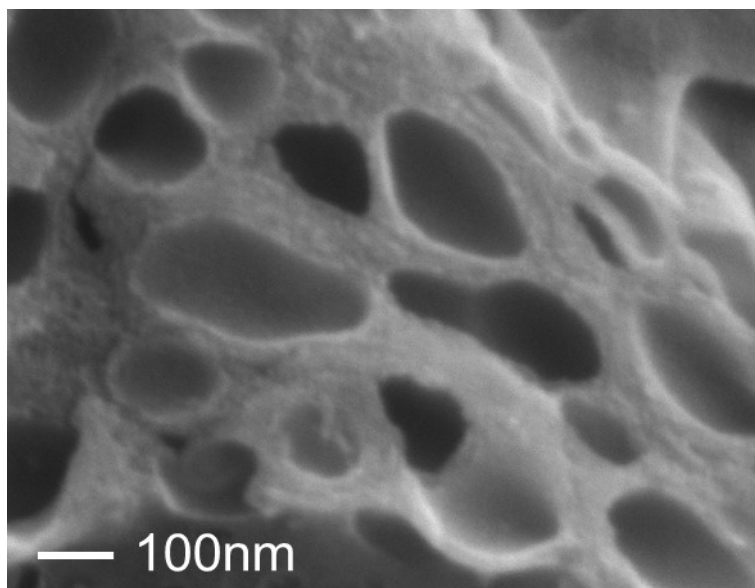

**Fig. S2.** SEM image of Fe-N<sub>4</sub>/NP-PHC.

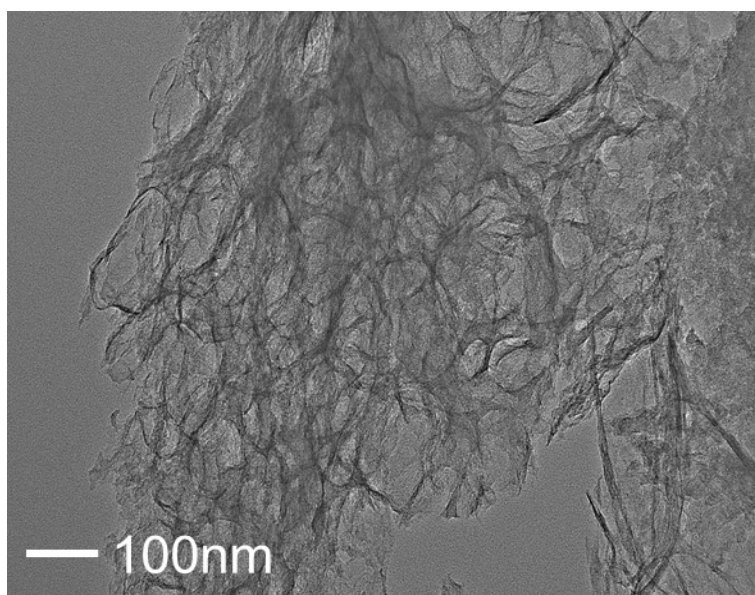

**Fig. S3.** TEM image of Fe-N<sub>4</sub>/NP-PHC.

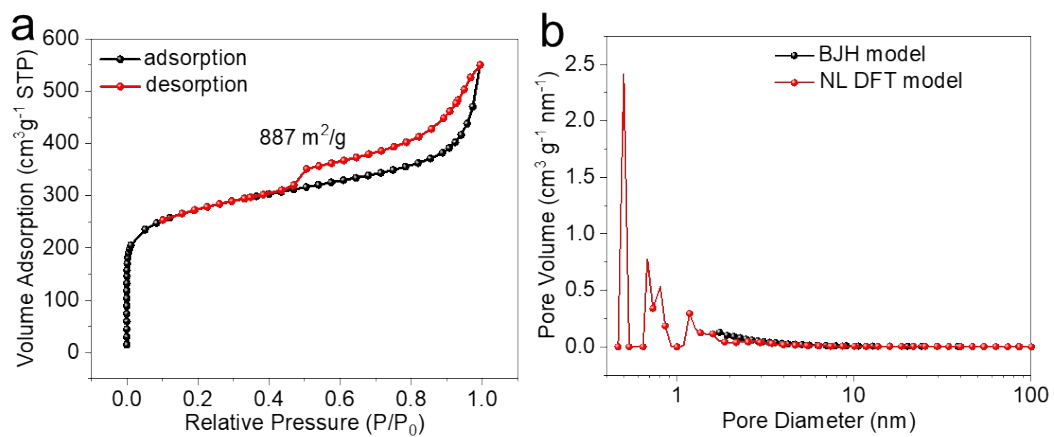

**Fig. S4.**  $\text{N}_2$  adsorption-desorption isotherms and the corresponding pore distribution of Fe- $\text{N}_4$ /NP-PHC.

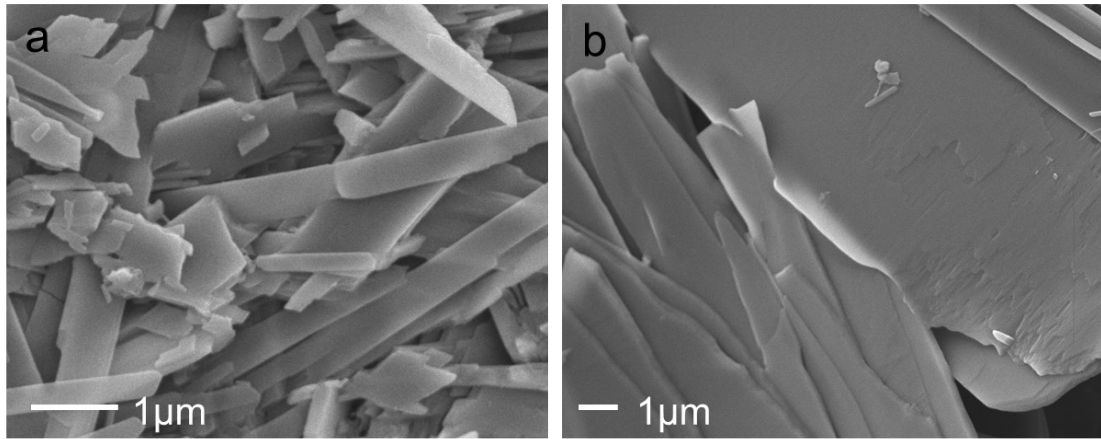

**Fig. S5.** SEM images of Fe-M-CA.

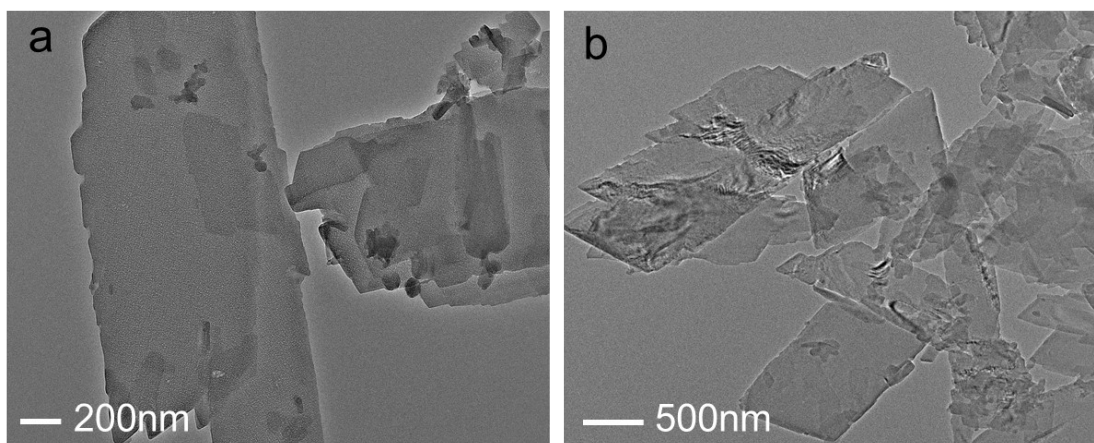

**Fig. S6.** TEM images of Fe-M-CA.

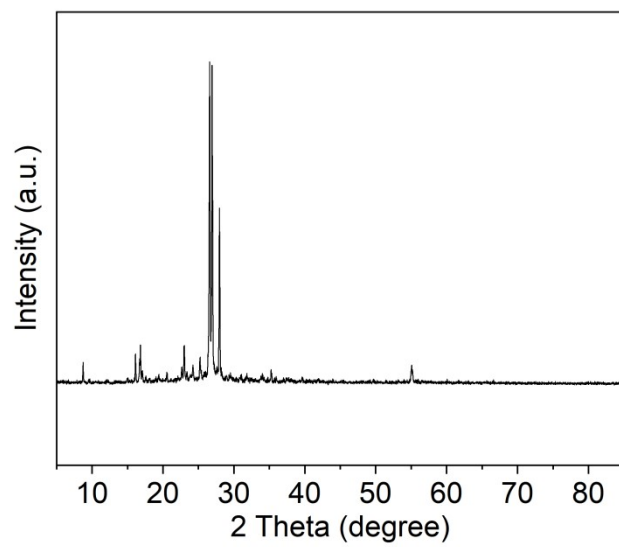

**Fig. S7.** XRD pattern of Fe-M-CA.



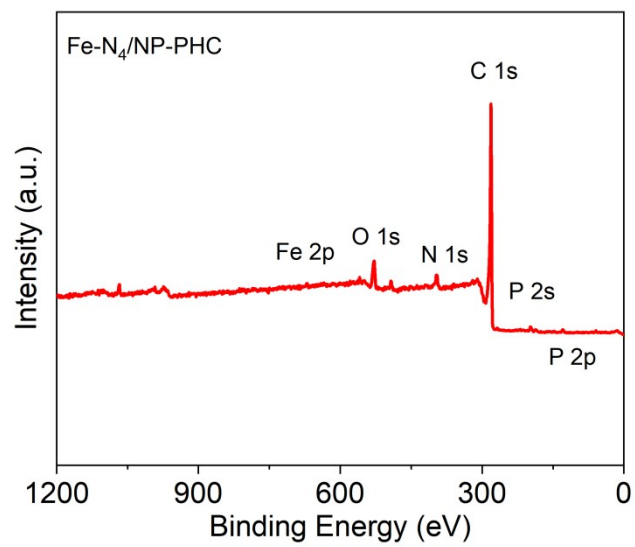

**Fig. S8.** The survey XPS spectra of Fe-N<sub>4</sub>/NP-PHC.

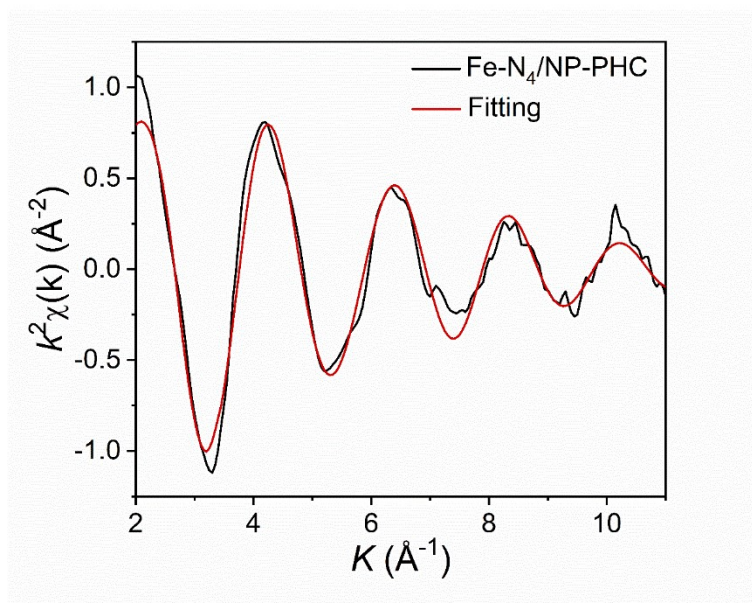

**Fig. S9.** EXAFS fitting results of Fe-N<sub>4</sub>/NP-PHC at k space.

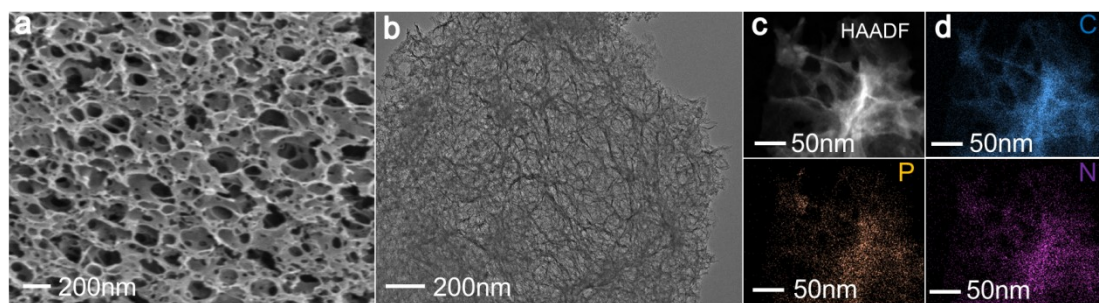

**Fig. S10.** (a) SEM and (b) TEM (c) HAADF-STEM and (d) elemental mapping images of NP-PHC.

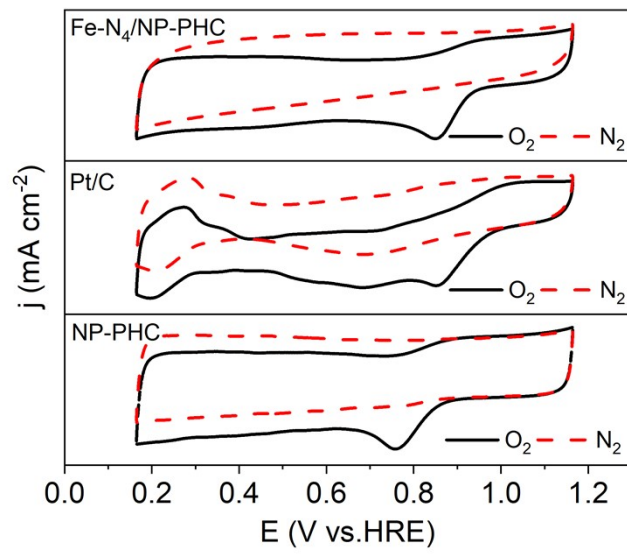

**Fig. S11.** CV curves of Fe-N<sub>4</sub>/NP-PHC, Pt/C and NP-PHC.

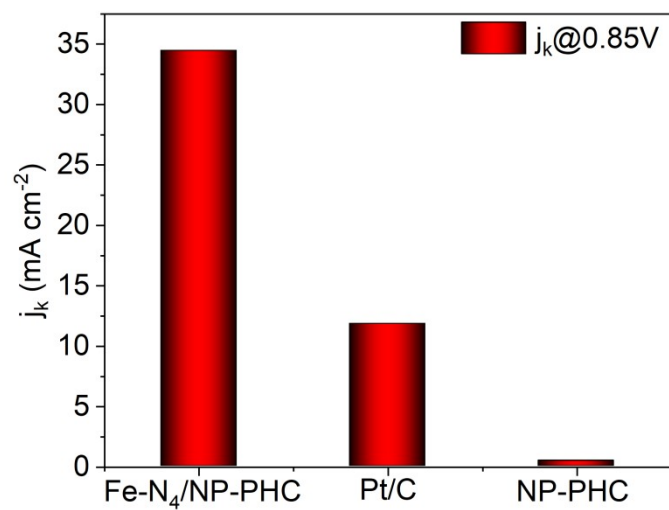

**Fig. S12.** Kinetic current density ( $j_k$ ) of Fe-N<sub>4</sub>/NP-PHC, Pt/C and NP-PHC at 0.85 V.

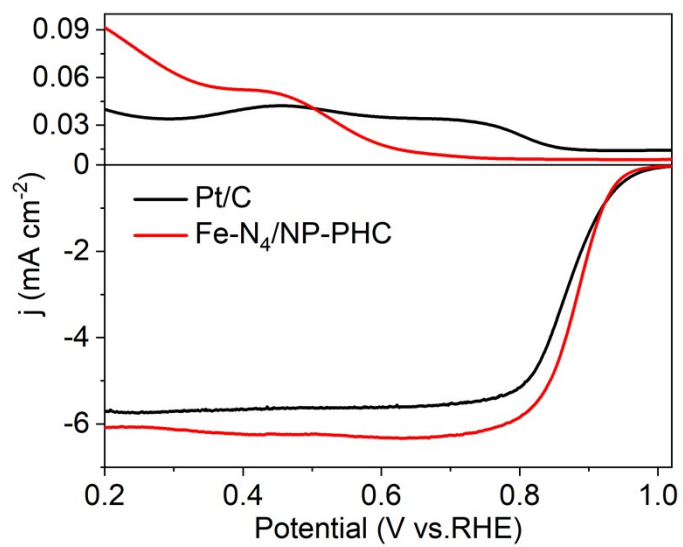

**Fig. S13.** Rotating ring disk electrode polarization curves of Fe-N<sub>4</sub>/NP-PHC and Pt/C.

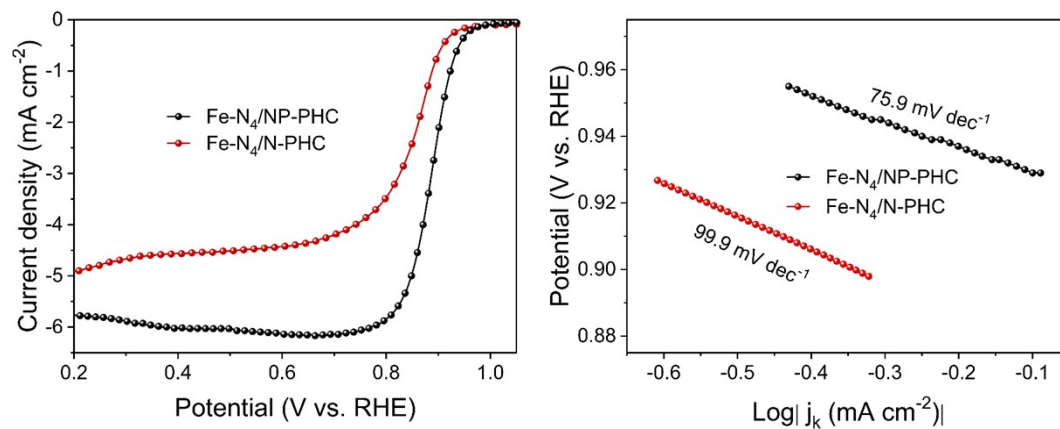

**Fig. S14.** (a) ORR polarization curves and (b) corresponding Tafel plots of Fe-N<sub>4</sub>/NP-PHC and Fe-N<sub>4</sub>/N-PHC.

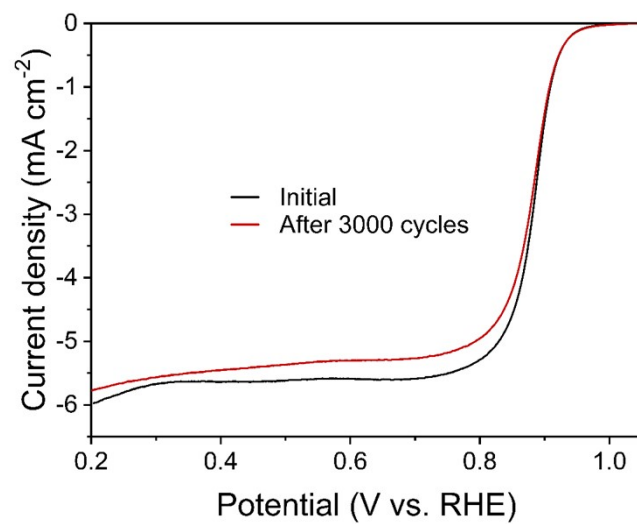

**Fig. S15.** ORR polarization curves before and after 3000 potential cycles for Fe-N<sub>4</sub>/NP-PHC catalyst.



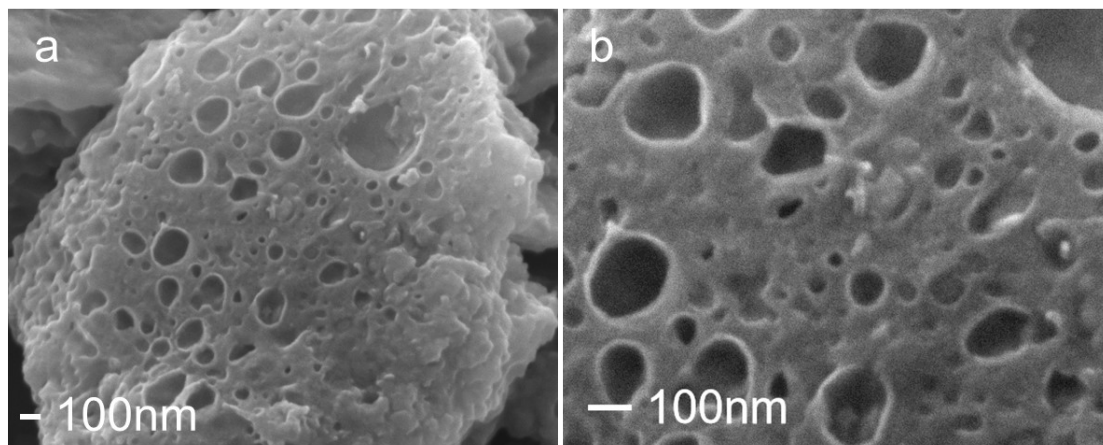

**Fig. S16.** SEM of Fe-N<sub>4</sub>/NP-PHC after ORR durability measurement.

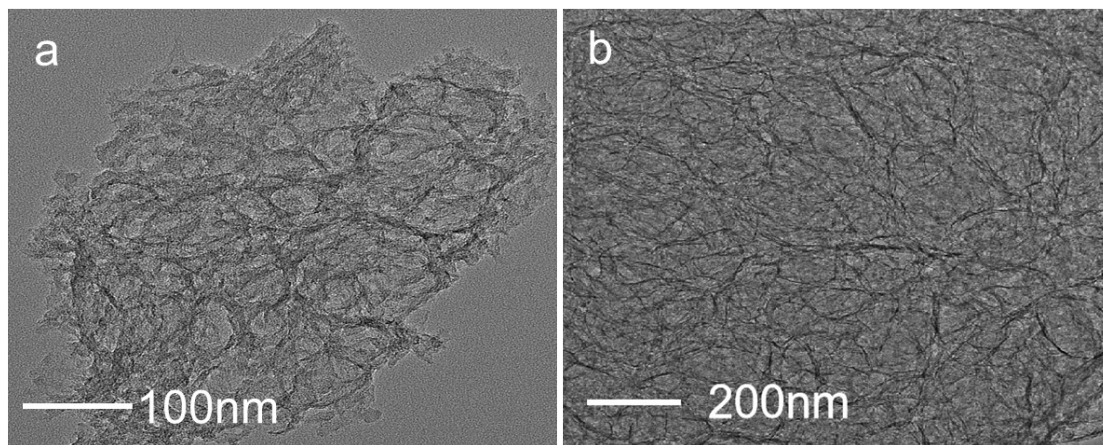

**Fig. S17.** TEM of Fe-N<sub>4</sub>/NP-PHC after ORR durability measurement.

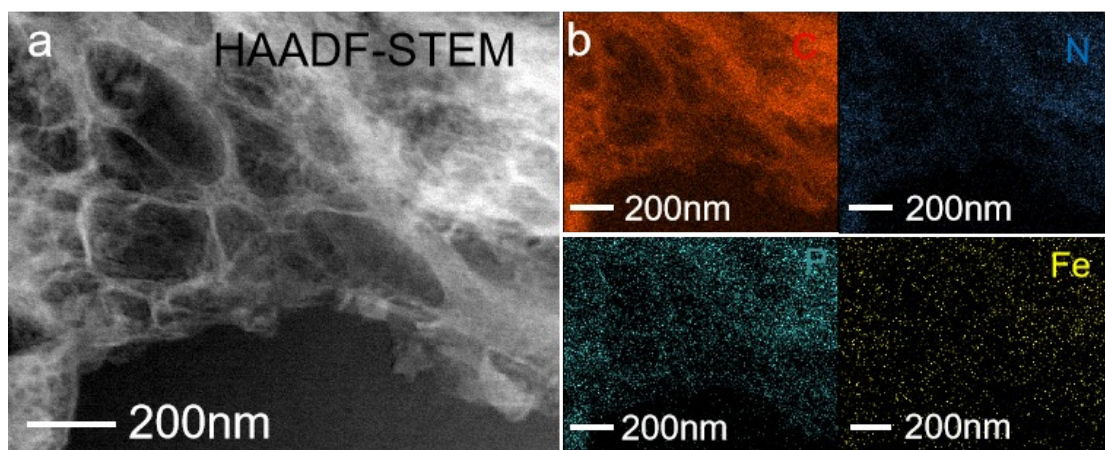

**Fig. S18.** (a) HAADF-STEM and (b) mapping images of Fe-N<sub>4</sub>/NP-PHC after ORR durability measurement.

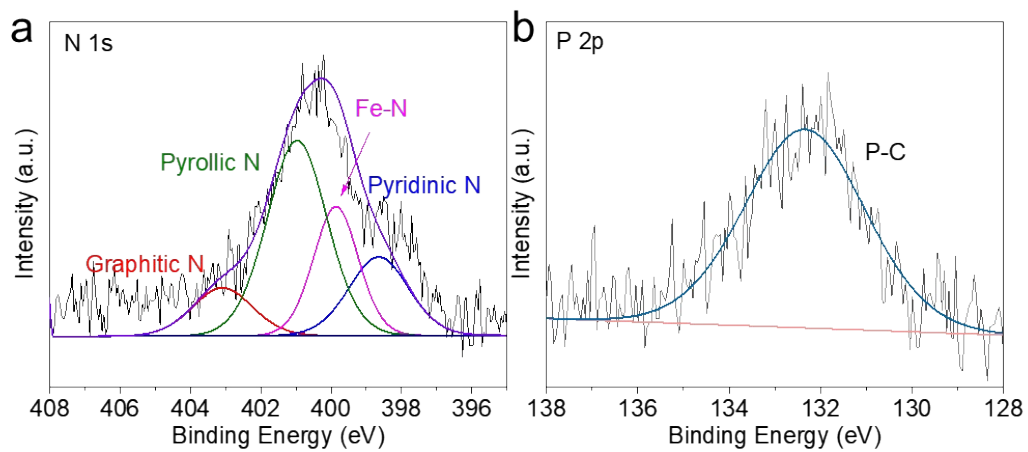

**Fig. S19.** XPS of Fe-N<sub>4</sub>/NP-PHC after ORR durability measurement.

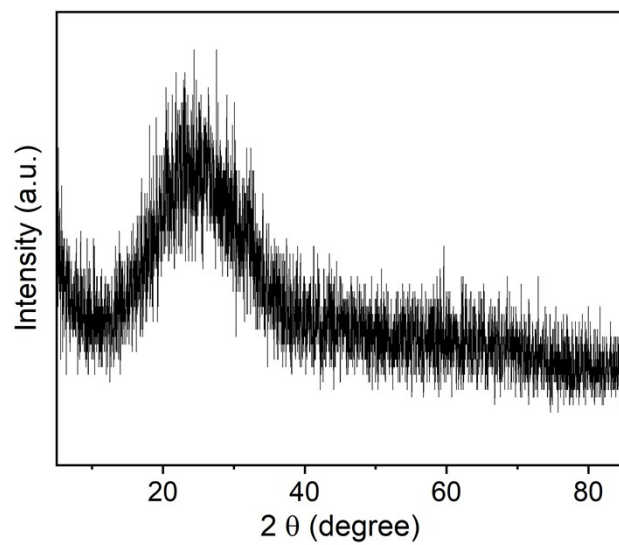

**Fig. S20.** XRD spectra of Fe-N<sub>4</sub>/NP-PHC after stability test.

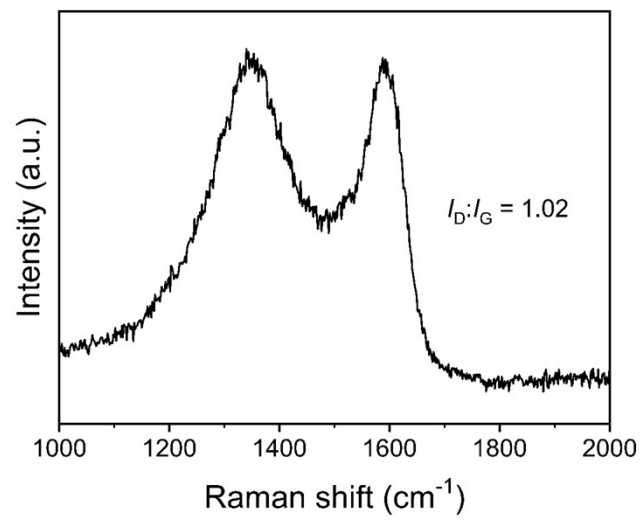

**Fig. S21.** Raman spectra of Fe-N<sub>4</sub>/NP-PHC after stability test.

**Table S1.** Structural parameters extracted from EXAFS data fitting of ( $S_0^2 = 1$ )

| <b>Samples</b>            | <b>Shell</b> | <b>CN</b> | <b>R(Å)</b> | <b><math>\sigma^2</math> (Å<sup>2</sup>)</b> | <b><math>\Delta E_0</math> (eV)</b> | <b>R-factor</b> |
|---------------------------|--------------|-----------|-------------|----------------------------------------------|-------------------------------------|-----------------|
| Fe-N <sub>4</sub> /NP-PHC | Fe-N         | 4.1       | 2.01        | 0.006                                        | -4.58                               | 0.012           |

CN is the coordination number; R is interatomic distance;  $\sigma^2$  is Debye-Waller factor (a measure of thermal and static disorder);  $\Delta E_0$ : edge-energy shift (the difference between the zero kinetic energy value of the sample and that of the theoretical model); R factor is used to evaluate the goodness of the fitting.

**Table S2.** Performance of the reported state-of-the-art ORR SACs in 0.1 M KOH.

| Catalyst                                 | $E_{\text{onset}}$ (V vs.RHE) | $E_{1/2}$ (V vs.RHE) | References       |
|------------------------------------------|-------------------------------|----------------------|------------------|
| <b>Fe-N<sub>4</sub>/NP-PHC</b>           | <b>1.0 V</b>                  | <b>0.89V</b>         | <b>This work</b> |
| Ni-N <sub>4</sub>                        | 0.97 V                        | 0.86 V               | [1]              |
| Fe/OES                                   | 1.0 V                         | 0.85 V               | [2]              |
| FePc&rGO                                 | 0.98 V                        | 0.89 V               | [3]              |
| Co-SAC/NC                                | 1.019 V                       | 0.884 V              | [4]              |
| Co-N-C SA/HCF                            | 0.928 V                       | 0.801 V              | [5]              |
| Fe <sub>3</sub> C                        | 0.987 V                       | 0.855 V              | [6]              |
| Co-N <sub>3</sub> C <sub>1</sub>         | 0.904 V                       | 0.824 V              | [7]              |
| FeSAs/PTF-600                            | 1.01 V                        | 0.87 V               | [8]              |
| CNT@SAC-Co/NCP                           | --                            | 0.87 V               | [9]              |
| SACe-N/PC                                | 1.0 V                         | 0.88 V               | [10]             |
| NBCNT-10                                 | 0.958 V                       | 0.82 V               | [11]             |
| CoFe/S-N-C                               | --                            | 0.855 V              | [12]             |
| WN-Ni@N,P-CNT                            | 1.02 V                        | 0.84 V               | [13]             |
| Co,Nb-MoS <sub>2</sub> /TiO <sub>2</sub> | 0.96 V                        | 0.86 V               | [14]             |
| 3DOM P-Co <sub>3</sub> O <sub>4-δ</sub>  | 0.99 V                        | 0.82 V               | [15]             |
| Co <sub>9</sub> S <sub>8</sub> @N, S-C   | 1.03 V                        | 0.887 V              | [16]             |
| PdNi/Ni@N-C                              | 1.01 V                        | 0.89 V               | [17]             |
| Fe-doped MOF<br>CuCoSe@HCNF              | --                            | 0.756 V              | [18]             |
| Co/MnO@NC                                | 0.96 V                        | 0.83 V               | [19]             |



**Table S3.** Calculated  $\Delta G$  for  $4e^-$  ORR pathway on Fe-N<sub>4</sub> and Fe-N<sub>4</sub>-P at U = 0 V vs. RHE.

| <b>U = 0 V</b>           | <b>O<sub>2</sub> (eV)</b> | <b>OOH* (eV)</b> | <b>O* (eV)</b> | <b>OH* (eV)</b> | <b>OH<sup>-</sup> (eV)</b> |
|--------------------------|---------------------------|------------------|----------------|-----------------|----------------------------|
| Fe-N <sub>4</sub> /NP-CM | 4.92                      | 3.39978          | 1.17276        | 0.1461          | 0.00                       |
| Fe-N <sub>4</sub> /N-CM  | 4.92                      | 3.2197           | 1.18296        | 0.05421         | 0.00                       |

**Table S4.** Calculated  $\Delta G$  for  $4e^-$  ORR pathway on Fe-N<sub>4</sub> and Fe-N<sub>4</sub>-P at U = 1.23 V (vs. RHE).

| <b>U = 1.23 V</b>        | <b>O<sub>2</sub> (eV)</b> | <b>OOH* (eV)</b> | <b>O* (eV)</b> | <b>OH* (eV)</b> | <b>OH<sup>-</sup> (eV)</b> |
|--------------------------|---------------------------|------------------|----------------|-----------------|----------------------------|
| Fe-N <sub>4</sub> /NP-CM | 0                         | -0.29022         | -1.28724       | -1.0839         | 0.00                       |
| Fe-N <sub>4</sub> /N-CM  | 0                         | -0.4703          | -1.27704       | -1.17579        | 0.00                       |

**Table S5.** Performance of rechargeable Zn-air batteries assembled using SACs.

| Catalyst                            | Peak power density (mW cm <sup>-2</sup> ) | Charge/discharge voltage gap (V) at 10mA cm <sup>-2</sup> | Battery stability             | References       |
|-------------------------------------|-------------------------------------------|-----------------------------------------------------------|-------------------------------|------------------|
| <b>Fe-N<sub>4</sub>/NP-PHC</b>      | <b>200</b>                                | <b>1.0</b>                                                | <b>20 min/cycle for 100 h</b> | <b>This work</b> |
| BCN/rGO-Co                          | 157                                       | 1.235                                                     | for 200 h                     | [20]             |
| Fe/N-G-SAC                          | 120                                       | 0.78                                                      | 1 h/cycle for 240 h           | [21]             |
| Ni <sub>3</sub> Fe/Co-N-C           | 68                                        | 0.78                                                      | for 65 h                      | [22]             |
| Pt@CoS <sub>2</sub> -NrGO           | 114                                       | 0.88                                                      | for 55 h                      | [23]             |
| CoNP-PTCOF                          | 53                                        | 1.2                                                       | 10 min/cycle for 120 h        | [24]             |
| 3DOM Co <sub>3</sub> O <sub>4</sub> | --                                        | 0.96                                                      | 2 h/cycle for 400 h           | [25]             |
| Cop@CoNC                            | 188.8                                     | 0.80                                                      | for 360 h                     | [26]             |
| CoNP-s-IMCOF                        | 48                                        | 1.1                                                       | 10 min cycle for 157h         | [27]             |
| P-CoO@PWC-2                         | 73                                        | 0.83                                                      | 20 min/cycle for 233.3 h      | [28]             |
| Fe-Co <sub>2</sub> P@Fe-N-C         | 81                                        | 0.73                                                      | 40 min/cycle for 283.3 h      | [29]             |
| NiFe@C@Co CNFs                      | 130                                       | 0.73                                                      | 20 min/cycle for 400 h        | [30]             |

## References

- [1] Z. Cai, P. Du, W. Liang, H. Zhang, P. Wu, C. Cai, Z. Yan, *J. Mater. Chem. A*, 2020, 8, 15012-15022.
- [2] C.C. Hou, L. Zou, L. Sun, K. Zhang, Z. Liu, Y. Li, C. Li, R. Zou, J. Yu, Q. Xu, *Angew. Chem. Int. Ed.*, 2020, 59, 7384-7389.
- [3] Z.-y. Mei, S. Cai, G. Zhao, Q. Jing, X. Sheng, J. Jiang, H. Guo, *Energy Storage Mater.*, 2022, 50, 12-20.
- [4] P. Rao, J.M. Luo, D.X. Wu, J. Li, Q. Chen, P.L. Deng, Y.J. Shen, X.L. Tian, *Energy & Environ. Mater.* doi: 10.1002/eem2.12371
- [5] J. Lei, H. Liu, D. Yin, L. Zhou, J.A. Liu, Q. Chen, X. Cui, R. He, T. Duan, W. Zhu, *Small*, 2020, 16, 1905920-1905929.
- [6] M.M. Mohideen, A. V. Radhamani, S. Ramakrishna, Y. Wei, Y. Liu, *J. Energy Chem.*, 2022, 69, 466-489.
- [7] X. Hai, X. Zhao, N. Guo, C. Yao, C. Chen, W. Liu, Y. Du, H. Yan, J. Li, Z. Chen, X. Li, Z. Li, H. Xu, P. Lyu, J. Zhang, M. Lin, C. Su, S.J. Pennycook, C. Zhang, S. Xi, J. Lu, *ACS Catal.*, 2020, 10, 5862-5870.
- [8] Y. Zhou, G. Chen, Q. Wang, D. Wang, X. Tao, T. Zhang, X. Feng, K. Müllen, *Adv. Funct. Mater.*, 2021, 31, 2102420-2102428.
- [9] J.C. Li, Y. Meng, L. Zhang, G. Li, Z. Shi, P.X. Hou, C. Liu, H.M. Cheng, M. Shao, *Adv. Funct. Mater.*, 2021, 31, 2103360-2103368.
- [10] J.C. Li, X. Qin, F. Xiao, C. Liang, M. Xu, Y. Meng, E. Sarnello, L. Fang, T. Li, S. Ding, Z. Lyu, S. Zhu, X. Pan, P.X. Hou, C. Liu, Y. Lin, M. Shao, *Nano Lett.*, 2021,

21, 4508-4515.

[11] P. Wei, X. Li, Z. He, X. Sun, Q. Liang, Z. Wang, C. Fang, Q. Li, H. Yang, J. Han, Y. Huang, *Chem. Eng.*, 2021, 422, 130134-130143.

[12] G. Li, Y. Tang, T. Fu, Y. Xiang, Z. Xiong, Y. Si, C. Guo, Z. Jiang, *Chem. Eng.*, 2022, 429, 132174-132181.

[13] Q. Zhang, F. Luo, X. Long, X. Yu, K. Qu, Z. Yang, *Appl. Catal. B Environ.*, 2021, 298, 120511-120519.

[14] D.C. Nguyen, T.L. Luyen Doan, S. Prabhakaran, D.T. Tran, D.H. Kim, J.H. Lee, N.H. Kim, *Nano Energy*, 2021, 82, 105750-105764.

[15] D. Wang, Y.-P. Deng, Y. Zhang, Y. Zhao, G. Zhou, L. Shui, Y. Hu, M. Shakouri, X. Wang, Z. Chen, *Energy Storage Mater.*, 2021, 41, 427-435.

[16] D. Lyu, S. Yao, A. Ali, Z.Q. Tian, P. Tsiakaras, P.K. Shen, *Adv. Energy Mater.*, 2021, 11, 2101249-2101261.

[17] Z. Li, H. Li, M. Li, J. Hu, Y. Liu, D. Sun, G. Fu, Y. Tang, *Energy Storage Mater.*, 2021, 42, 118-128.

[18] S.-H. Chae, A. Muthurasu, T. Kim, J.S. Kim, M.-S. Khil, M. Lee, H. Kim, J.Y. Lee, H.Y. Kim, *Appl. Catal. B Environ.*, 2021, 293, 120209-120220.

[19] Y. Niu, X. Teng, S. Gong, X. Liu, M. Xu, Z. Chen, *Energy Storage Mater.*, 2021, 43, 42-52.

[20] L. Cao, Y. Wang, Q. Zhu, L.L. Fan, Y. Wu, Z.H. Li, S.X. Xiong, F. Gu, *ACS Appl. Mater. Interfaces*, 2022, 14, 17249–17258.

[21] M. Xiao, Z. Xing, Z. Jin, C. Liu, J. Ge, J. Zhu, Y. Wang, X. Zhao, Z. Chen, *Adv.*

- Mater., 2020, 32, 2004900-2004908.
- [22] J. Tan, T. Thomas, J. Liu, L. Yang, L. Pan, R. Cao, H. Shen, J. Wang, J. Liu, M. Yang, Chem. Eng., 2020, 395, 125151-125177.
- [23] N. Logeshwaran, S. Ramakrishnan, S.S. Chandrasekaran, M. Vinothkannan, A.R. Kim, S. Sengodan, D.B. Velusamy, P. Varadhan, J.-H. He, D.J. Yoo, Appl. Catal. B Environ., 2021, 297, 120405-120416.
- [24] J.H. Park, C.H. Lee, J.M. Ju, J.H. Lee, J. Seol, S.U. Lee, J.H. Kim, Adv. Funct. Mater., 2021, 31, 2101727-2101736.
- [25] M.G. Park, D.U. Lee, M.H. Seo, Z.P. Cano, Z. Chen, Small, 2016, 12, 2707-2714.
- [26] H. Yang, S.A. Gao, D.W. Rao, X.H. Yan, Energy Storage Mater., 2022, 46, 553-562
- [27] J.-M. Ju, C. H. Lee, J. Hyun Park, J.-H. Lee, H.J. Lee, J.-H. Shin, S.-Y. Kwak, S. U. Lee, J.-H. Kim, ACS Appl. Mater. Interfaces DOI: 10.1021/acsami.2c04194
- [28] H. Liu, Y. Liu, S. Mehdi, X. Wu, T. Liu, B. Zhou, P. Zhang, J. Jiang, B. Li, Adv. Sci., 2021, 8, 2101314-2101325.
- [29] X.W. Lv, W.S. Xu, W.W. Tian, H.Y. Wang, Z.Y. Yuan, Small, 2021, 17, 2101856-2101868.
- [30] X. Chen, J. Pu, X.H. Hu, Y.C. Yao, Y.B. Dou, J.J. Jiang, W.J. Zhang, Small, 2022, 18, 2200578-2200589.
